# Supplementary material for: The association between physical activity and body fat percentage with adjustment for body mass index among middle-aged adults: China health and nutrition survey in 2015
Source: Springer Nature journal article supplement (doi:10.1186/s12889-020-08832-0), 2020-05-19
Supplement: MOESM1 [file 17996836]

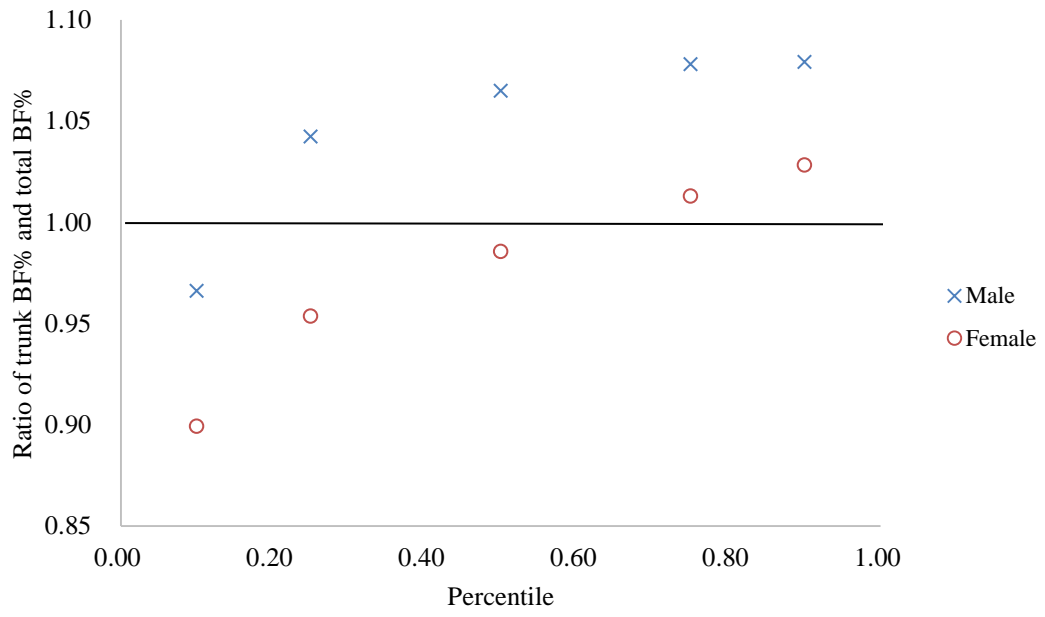

**Additional File 1. Ratios of trunk and total body fat% at the 10<sup>th</sup>, 25<sup>th</sup>, 50<sup>th</sup>, 75<sup>th</sup> and 90<sup>th</sup> percentiles.**
